# Supplementary material for: Trace element analysis in lithium matrices using micro-discharge optical emission spectroscopy
Source: Royal Society of Chemistry journal article supplement (doi:10.1039/d4ja00044g), 2024-01-01
Supplement: d4ja00044g1.pdf [file d4ja00044g1.pdf]

## Supplementary Information

### Trace element analysis in lithium matrices using Micro-Discharge Optical Emission Spectroscopy

Bastian Wiggershaus<sup>a</sup>, Miisamari Jeskanen<sup>b</sup>, Aappo Roos<sup>b</sup>, Carla Vogt<sup>a\*</sup>  
and Toni Laurila<sup>b</sup>

<sup>a</sup> TU Bergakademie Freiberg, Institute of Analytical Chemistry, Leipziger Straße 29, 09599 Freiberg, Germany

<sup>b</sup> Sensmet Oy, Customer Application Center, Otakaari 7, 02150 Espoo, Finland

E-Mail: Carla.Vogt@Chemie.tu-freiberg.de, toni.laurila@sensmet.com

\*Corresponding author

The following supplementary information provides additional raw data to support the presented results of the corresponding paper. The tables list the intensities of the emission lines used at the respective time and/or concentration level.

#### List of tables

|                                                                                                                                                       |   |
|-------------------------------------------------------------------------------------------------------------------------------------------------------|---|
| Table A1 Intensities in a.u. of Li 670.7 nm and Li 812.6 nm at different integration settings (n=3). .....                                            | 1 |
| Table A2 Intensities in a.u. of Li 670.7 nm and Li 812.6 nm of the blank measurements (n=20), which were used to calculate the detection limits. .... | 2 |
| Table A3 Intensities in a.u. of the lithium and sodium calibration series, which were used for the multi-linear regression model. ....                | 2 |
| Table A4 Intensities in a.u. of the long-term stability measurements of a lithium hydroxide solution containing 1 mg/L Li. ....                       | 6 |

Table A1 Intensities in a.u. of Li 670.7 nm and Li 812.6 nm at different integration settings (n=3).

| Li in mg/L | Single pulse    |             |            | Pulse series     |                 |            |
|------------|-----------------|-------------|------------|------------------|-----------------|------------|
|            | Li 670.7 nm     | Li 812.6 nm | H 486.1 nm | Li 670.7 nm      | Li 812.6 nm     | H 486.1 nm |
| 0          | 0.21            | 0.07        | 77.01      | 0                | 9.20            | 3721.94    |
| 0.05       | 32.38           | 0.69        | 78.98      | 1452.95          | 16.70           | 3681.78    |
| 0.10       | 86.98           | 0.88        | 84.94      | 4177.26          | 44.96           | 4083.04    |
| 0.25       | 249.38          | 2.36        | 87.26      | 11774.45         | 126.45          | 4177.04    |
| 0.50       | 459.25          | 5.28        | 89.63      | <b>17525.73*</b> | 263.66          | 4401.03    |
| 0.75       | 672.98          | 8.06        | 95.55      | <b>20895.38</b>  | 412.50          | 4731.98    |
| 1.0        | 853.28          | 10.94       | 95.80      | <b>22678.47</b>  | 562.17          | 4529.98    |
| 1.25       | 981.98          | 13.48       | 88.73      | <b>24164.93</b>  | 726.54          | 4241.60    |
| 2.0        | <b>1207.43*</b> | 20.00       | 83.20      | <b>26686.96</b>  | 1046.07         | 3969.43    |
| 2.5        | <b>1368.11</b>  | 24.31       | 82.11      | <b>28274.34</b>  | 1289.25         | 3791.57    |
| 3.0        | <b>1482.69</b>  | 28.91       | 80.06      | <b>29654.30</b>  | 1515.92         | 3790.98    |
| 5.0        | <b>1925.02</b>  | 46.09       | 81.10      | <b>34075.35</b>  | <b>2377.08*</b> | 3935.69    |
| 10         | <b>3325.13</b>  | 110.93      | 93.50      | <b>44276.69</b>  | <b>4891.86</b>  | 4494.34    |

\*linear model no longer accepted according to Mandel's linearity test ( $\alpha=0.99$ )

Table A2 Intensities in a.u. of Li 670.7 nm and Li 812.6 nm of the blank measurements (n=20), which were used to calculate the detection limits.

| No | Single pulse |             |            | Pulse series |             |            |
|----|--------------|-------------|------------|--------------|-------------|------------|
|    | Li 670.7 nm  | Li 812.6 nm | H 486.1 nm | Li 670.7 nm  | Li 812.6 nm | H 486.1 nm |
| 1  | 0.12         | 0.17        | 46.35      | 0*           | 1.32        | 3721.94    |
| 2  | 0.23         | 0.58        | 75.91      | 0            | 5.63        | 3610.46    |
| 3  | 0.70         | 0.22        | 80.43      | 20.94        | 6.77        | 3768.39    |
| 4  | 0.14         | 0.10        | 77.00      | 70.30        | 8.45        | 3728.54    |
| 5  | 1.25         | 0.78        | 79.91      | 100.70       | 12.17       | 3835.45    |
| 6  | 1.26         | 0.40        | 75.48      | 137.12       | 9.68        | 3698.89    |
| 7  | 0.82         | 0.36        | 78.48      | 133.23       | 11.53       | 3804.26    |
| 8  | 0.93         | 0.26        | 78.14      | 0            | 9.58        | 3851.39    |
| 9  | 0.49         | 0.02        | 77.74      | 69.88        | 10.24       | 3723.37    |
| 10 | 1.22         | 0.04        | 80.05      | 131.76       | 9.09        | 3948.18    |
| 11 | 1.59         | 0.67        | 79.06      | 191.08       | 8.28        | 3769.71    |
| 12 | 0.77         | 0.51        | 78.39      | 198.21       | 11.15       | 3837.30    |
| 13 | 2.47         | 0.26        | 77.10      | 334.22       | 10.97       | 3651.31    |
| 14 | 4.65         | 0.23        | 76.11      | 496.84       | 14.91       | 3754.19    |
| 15 | 4.53         | 0.17        | 71.16      | 504.61       | 15.05       | 3590.59    |
| 16 | 1.57         | 0.34        | 71.55      | 37.88        | 11.38       | 3487.08    |
| 17 | 1.40         | 0.24        | 74.82      | 0            | 9.74        | 3454.30    |
| 18 | 0.97         | 0.21        | 75.49      | 0            | 8.30        | 3692.85    |
| 19 | 0.26         | 0.79        | 74.81      | 0            | 10.43       | 3792.57    |
| 20 | 0.04         | 0.26        | 75.81      | 0            | 9.42        | 3519.14    |

\*negative intensity values were set to zero

Table A3 Intensities in a.u. of the lithium and sodium calibration series, which were used for the multi-linear regression model.

| Li in mg/L | Na in µg/L | Parameter setting C |             |            |
|------------|------------|---------------------|-------------|------------|
|            |            | Li 812.6 nm         | Na 589.5 nm | H 486.1 nm |
| 0          | 0          | 31.95               | 19.17       | 5513.13    |
| 0          | 0          | 30.24               | 17.80       | 5498.74    |
| 0          | 0          | 30.31               | 15.14       | 5226.02    |
| 0          | 0          | 31.80               | 15.63       | 5311.85    |
| 0          | 0          | 31.95               | 19.17       | 5513.13    |
| 0.3        | 0          | 121.01              | 16.96       | 4497.36    |
| 0.3        | 0          | 171.97              | 19.80       | 5735.83    |
| 0.3        | 0          | 133.46              | 16.94       | 4866.81    |
| 0.3        | 0          | 135.54              | 17.55       | 4917.01    |
| 0.3        | 0          | 153.29              | 19.42       | 5678.53    |
| 0.3        | 9          | 147.18              | 75.56       | 5492.92    |
| 0.3        | 9          | 175.80              | 87.72       | 6081.90    |
| 0.3        | 9          | 147.34              | 77.56       | 5079.33    |
| 0.3        | 9          | 129.48              | 73.51       | 4889.01    |
| 0.3        | 9          | 148.57              | 78.05       | 5371.25    |
| 0.3        | 18         | 160.96              | 145.08      | 5571.51    |
| 0.3        | 18         | 143.54              | 131.10      | 5205.34    |
| 0.3        | 18         | 160.13              | 143.54      | 5704.73    |
| 0.3        | 18         | 145.24              | 130.01      | 5152.02    |

| Li in mg/L | Na in µg/L | Parameter setting C |             |            |
|------------|------------|---------------------|-------------|------------|
|            |            | Li 812.6 nm         | Na 589.5 nm | H 486.1 nm |
| 0.3        | 18         | 134.00              | 122.59      | 4873.24    |
| 0.3        | 27         | 165.94              | 212.57      | 5671.71    |
| 0.3        | 27         | 175.23              | 226.83      | 5816.24    |
| 0.3        | 27         | 164.49              | 212.81      | 5646.74    |
| 0.3        | 27         | 149.22              | 195.00      | 5274.35    |
| 0.3        | 27         | 144.89              | 184.29      | 5254.30    |
| 0.3        | 36         | 149.36              | 252.30      | 5084.08    |
| 0.3        | 36         | 153.23              | 261.12      | 6471.27    |
| 0.3        | 36         | 161.39              | 264.86      | 5454.74    |
| 0.3        | 36         | 168.47              | 277.75      | 6181.78    |
| 0.3        | 36         | 171.92              | 273.16      | 6206.94    |
| 0.3        | 44         | 159.75              | 320.00      | 5418.20    |
| 0.3        | 44         | 135.49              | 278.34      | 4926.80    |
| 0.3        | 44         | 158.21              | 316.16      | 5504.59    |
| 0.3        | 44         | 164.12              | 331.00      | 5815.90    |
| 0.3        | 44         | 153.55              | 304.49      | 5656.14    |
| 0.6        | 0          | 303.09              | 20.16       | 5491.79    |
| 0.6        | 0          | 307.48              | 18.07       | 5492.35    |
| 0.6        | 0          | 341.77              | 19.67       | 5814.50    |
| 0.6        | 0          | 320.75              | 19.65       | 5740.92    |
| 0.6        | 0          | 354.53              | 20.43       | 5844.05    |
| 0.6        | 9          | 342.34              | 84.10       | 5955.23    |
| 0.6        | 9          | 262.15              | 69.00       | 5003.98    |
| 0.6        | 9          | 344.78              | 89.22       | 5961.93    |
| 0.6        | 9          | 337.30              | 87.69       | 6105.47    |
| 0.6        | 9          | 305.09              | 81.11       | 5476.45    |
| 0.6        | 18         | 306.50              | 142.29      | 5602.66    |
| 0.6        | 18         | 327.82              | 149.57      | 5924.28    |
| 0.6        | 18         | 315.93              | 144.88      | 5407.83    |
| 0.6        | 18         | 285.21              | 133.03      | 5401.59    |
| 0.6        | 18         | 325.20              | 151.28      | 5870.98    |
| 0.6        | 27         | 339.88              | 225.31      | 6111.97    |
| 0.6        | 27         | 323.97              | 211.80      | 5634.19    |
| 0.6        | 27         | 308.47              | 202.26      | 5561.49    |
| 0.6        | 27         | 348.10              | 225.20      | 5815.77    |
| 0.6        | 27         | 350.82              | 232.52      | 5828.55    |
| 0.6        | 36         | 322.81              | 271.88      | 5667.80    |
| 0.6        | 36         | 323.18              | 273.90      | 5996.75    |
| 0.6        | 36         | 319.62              | 272.68      | 5655.83    |
| 0.6        | 36         | 319.41              | 277.24      | 5691.92    |
| 0.6        | 36         | 325.56              | 272.69      | 6010.36    |
| 0.6        | 44         | 318.96              | 348.23      | 5697.90    |
| 0.6        | 44         | 282.53              | 294.96      | 5413.81    |
| 0.6        | 44         | 298.17              | 318.44      | 5460.31    |
| 0.6        | 44         | 301.63              | 303.22      | 5467.86    |
| 0.6        | 44         | 296.45              | 312.07      | 5536.93    |
| 0.9        | 0          | 611.17              | 25.28       | 5772.72    |
| 0.9        | 0          | 547.72              | 20.45       | 5490.40    |
| 0.9        | 0          | 531.62              | 25.73       | 6857.30    |
| 0.9        | 0          | 533.02              | 19.00       | 5385.13    |

| Li in mg/L | Na in µg/L | Parameter setting C |             |            |
|------------|------------|---------------------|-------------|------------|
|            |            | Li 812.6 nm         | Na 589.5 nm | H 486.1 nm |
| 0.9        | 0          | 469.22              | 20.75       | 4965.01    |
| 0.9        | 9          | 532.55              | 86.56       | 5526.88    |
| 0.9        | 9          | 582.50              | 99.40       | 6402.02    |
| 0.9        | 9          | 539.90              | 92.72       | 5614.92    |
| 0.9        | 9          | 518.97              | 86.87       | 5482.81    |
| 0.9        | 9          | 510.85              | 87.77       | 5526.04    |
| 0.9        | 18         | 494.74              | 148.06      | 5460.81    |
| 0.9        | 18         | 562.11              | 169.57      | 5869.33    |
| 0.9        | 18         | 455.44              | 136.37      | 5164.16    |
| 0.9        | 18         | 558.56              | 164.72      | 5864.12    |
| 0.9        | 18         | 469.43              | 141.46      | 5187.79    |
| 0.9        | 27         | 478.32              | 207.74      | 5535.40    |
| 0.9        | 27         | 492.48              | 210.49      | 5368.05    |
| 0.9        | 27         | 539.24              | 234.61      | 5730.12    |
| 0.9        | 27         | 443.27              | 194.11      | 5194.09    |
| 0.9        | 27         | 537.13              | 226.04      | 5679.35    |
| 0.9        | 36         | 541.29              | 300.33      | 6175.64    |
| 0.9        | 36         | 553.64              | 306.50      | 5762.29    |
| 0.9        | 36         | 592.35              | 327.50      | 6185.11    |
| 0.9        | 36         | 508.63              | 279.99      | 5765.77    |
| 0.9        | 36         | 538.46              | 299.63      | 6979.42    |
| 0.9        | 44         | 453.85              | 320.77      | 5157.15    |
| 0.9        | 44         | 524.37              | 355.60      | 5672.68    |
| 0.9        | 44         | 534.93              | 357.54      | 5816.74    |
| 0.9        | 44         | 464.49              | 314.64      | 5342.94    |
| 0.9        | 44         | 498.84              | 335.99      | 5683.25    |
| 1.2        | 0          | 674.56              | 27.41       | 5405.29    |
| 1.2        | 0          | 784.12              | 26.74       | 6386.23    |
| 1.2        | 0          | 757.80              | 21.26       | 5806.78    |
| 1.2        | 0          | 638.99              | 18.44       | 5255.19    |
| 1.2        | 0          | 813.40              | 21.74       | 5794.53    |
| 1.2        | 9          | 762.07              | 92.77       | 5698.49    |
| 1.2        | 9          | 785.46              | 97.59       | 5954.89    |
| 1.2        | 9          | 701.84              | 90.58       | 5465.10    |
| 1.2        | 9          | 640.18              | 82.17       | 5301.19    |
| 1.2        | 9          | 651.27              | 82.56       | 5315.21    |
| 1.2        | 18         | 559.69              | 130.03      | 7751.24    |
| 1.2        | 18         | 559.74              | 128.02      | 4939.98    |
| 1.2        | 18         | 599.12              | 132.79      | 4951.71    |
| 1.2        | 18         | 564.99              | 131.36      | 4868.09    |
| 1.2        | 18         | 584.44              | 129.77      | 4938.94    |
| 1.2        | 27         | 650.34              | 209.33      | 5420.03    |
| 1.2        | 27         | 781.74              | 250.46      | 5832.81    |
| 1.2        | 27         | 788.04              | 255.17      | 5786.66    |
| 1.2        | 27         | 643.80              | 206.55      | 5241.63    |
| 1.2        | 27         | 618.97              | 210.12      | 5236.69    |
| 1.2        | 36         | 724.80              | 300.68      | 5885.98    |
| 1.2        | 36         | 726.30              | 301.41      | 5677.70    |
| 1.2        | 36         | 675.31              | 279.48      | 5262.08    |
| 1.2        | 36         | 819.11              | 338.39      | 5916.73    |

| Li in mg/L | Na in µg/L | Parameter setting C |             |            |
|------------|------------|---------------------|-------------|------------|
|            |            | Li 812.6 nm         | Na 589.5 nm | H 486.1 nm |
| 1.2        | 36         | 727.16              | 303.25      | 5686.65    |
| 1.2        | 44         | 798.74              | 398.23      | 6393.54    |
| 1.2        | 44         | 691.11              | 350.40      | 5433.16    |
| 1.2        | 44         | 680.57              | 343.90      | 5397.72    |
| 1.2        | 44         | 793.84              | 402.92      | 5905.33    |
| 1.2        | 44         | 773.58              | 388.64      | 5813.32    |
| 1.5        | 0          | 1112.43             | 31.38       | 5928.52    |
| 1.5        | 0          | 947.02              | 19.73       | 5418.79    |
| 1.5        | 0          | 895.98              | 18.27       | 5273.35    |
| 1.5        | 0          | 1101.03             | 21.85       | 5980.84    |
| 1.5        | 0          | 948.44              | 18.79       | 5233.07    |
| 1.5        | 9          | 1074.05             | 102.75      | 5609.03    |
| 1.5        | 9          | 1125.64             | 108.18      | 5843.01    |
| 1.5        | 9          | 989.79              | 98.50       | 5417.34    |
| 1.5        | 9          | 906.27              | 90.80       | 5305.57    |
| 1.5        | 9          | 1070.76             | 103.77      | 5682.26    |
| 1.5        | 18         | 930.65              | 160.05      | 4998.67    |
| 1.5        | 18         | 832.66              | 146.80      | 4925.53    |
| 1.5        | 18         | 793.09              | 141.98      | 4475.02    |
| 1.5        | 18         | 1108.92             | 194.07      | 5700.91    |
| 1.5        | 18         | 947.51              | 166.11      | 5255.36    |
| 1.5        | 27         | 923.97              | 230.75      | 4981.20    |
| 1.5        | 27         | 1136.02             | 282.17      | 5686.29    |
| 1.5        | 27         | 1205.56             | 300.53      | 5983.33    |
| 1.5        | 27         | 947.52              | 233.43      | 5290.65    |
| 1.5        | 27         | 1197.89             | 293.59      | 5828.62    |
| 1.5        | 36         | 975.59              | 312.44      | 5184.99    |
| 1.5        | 36         | 1119.33             | 362.26      | 5820.44    |
| 1.5        | 36         | 1038.24             | 339.65      | 5506.45    |
| 1.5        | 36         | 1219.32             | 394.00      | 6139.98    |
| 1.5        | 36         | 1115.03             | 369.73      | 5833.47    |
| 1.5        | 44         | 1071.86             | 434.31      | 5912.55    |
| 1.5        | 44         | 1117.79             | 452.90      | 6101.66    |
| 1.5        | 44         | 1009.42             | 406.98      | 5629.07    |
| 1.5        | 44         | 986.06              | 397.50      | 5406.44    |
| 1.5        | 44         | 997.27              | 407.28      | 5526.67    |
| 2.0        | 0          | 1358.73             | 24.46       | 5414.46    |
| 2.0        | 0          | 1793.47             | 27.05       | 6025.59    |
| 2.0        | 0          | 1700.93             | 23.02       | 5763.41    |
| 2.0        | 0          | 1709.77             | 21.74       | 5746.21    |
| 2.0        | 0          | 1758.32             | 23.62       | 6023.89    |
| 2.0        | 9          | 1718.56             | 111.34      | 5829.09    |
| 2.0        | 9          | 1849.25             | 124.31      | 6309.54    |
| 2.0        | 9          | 1707.78             | 115.34      | 5824.09    |
| 2.0        | 9          | 1724.34             | 114.12      | 5788.84    |
| 2.0        | 9          | 1459.51             | 100.40      | 5299.14    |
| 2.0        | 18         | 1428.66             | 176.20      | 5310.59    |
| 2.0        | 18         | 1729.57             | 211.08      | 5906.10    |
| 2.0        | 18         | 1518.27             | 183.14      | 5321.71    |
| 2.0        | 18         | 1535.41             | 185.03      | 5336.34    |

| Li in mg/L | Na in µg/L | Parameter setting C |             |            |
|------------|------------|---------------------|-------------|------------|
|            |            | Li 812.6 nm         | Na 589.5 nm | H 486.1 nm |
| 2.0        | 18         | 1618.58             | 195.54      | 5594.29    |
| 2.0        | 27         | 1683.17             | 291.59      | 5837.49    |
| 2.0        | 27         | 1330.09             | 230.78      | 4939.22    |
| 2.0        | 27         | 1540.79             | 264.52      | 5449.04    |
| 2.0        | 27         | 1624.24             | 274.49      | 5568.36    |
| 2.0        | 27         | 1734.64             | 299.06      | 5987.99    |
| 2.0        | 36         | 1504.36             | 328.34      | 5441.48    |
| 2.0        | 36         | 1620.43             | 358.81      | 5613.21    |
| 2.0        | 36         | 1615.47             | 355.86      | 5702.00    |
| 2.0        | 36         | 1598.16             | 358.56      | 5836.56    |
| 2.0        | 36         | 1407.72             | 309.55      | 5176.20    |
| 2.0        | 44         | 1488.32             | 397.72      | 5530.29    |
| 2.0        | 44         | 1153.89             | 307.50      | 4730.04    |
| 2.0        | 44         | 1564.13             | 417.70      | 5531.76    |
| 2.0        | 44         | 1431.69             | 380.65      | 5101.04    |
| 2.0        | 44         | 1616.49             | 443.02      | 5741.28    |

Table A4 Intensities in a.u. of the long-term stability measurements of a lithium hydroxide solution containing 1 mg/L Li.

| Time in min | Parameter setting A |            | Parameter setting D |            |
|-------------|---------------------|------------|---------------------|------------|
|             | Li 812.6 nm         | H 486.1 nm | Li 670.7 nm         | H 486.1 nm |
| 0           | 2226.48             | 4543.94    | 2146.05             | 96.68      |
| 7           | 2286.57             | 4595.97    | 2165.92             | 96.34      |
| 14          | 2303.21             | 4607.71    | 2190.45             | 95.97      |
| 21          | 2464.85             | 4876.53    | 2146.72             | 95.44      |
| 28          | 2349.36             | 4667.21    | 1923.14             | 85.15      |
| 35          | 2168.62             | 4084.72    | 2056.90             | 90.40      |
| 42          | 2295.28             | 4363.98    | 2203.55             | 94.02      |
| 49          | 2293.75             | 4416.85    | 2131.48             | 93.77      |
| 56          | 2327.41             | 4509.87    | 2124.68             | 93.99      |
| 63          | 2406.20             | 4695.13    | 2208.60             | 98.55      |
| 70          | 2337.75             | 4565.89    | 2179.70             | 97.89      |
| 77          | 2416.52             | 4765.44    | 2078.16             | 92.23      |
| 84          | 2090.59             | 3970.47    | 1865.40             | 84.89      |
| 91          | 2216.77             | 4274.70    | 2003.50             | 89.10      |
| 98          | 2291.54             | 4384.85    | 1985.46             | 90.14      |
| 105         | 2259.06             | 4399.42    | 2110.55             | 95.72      |
| 112         | 2223.24             | 4461.44    | 2118.69             | 96.34      |
| 119         | 2325.65             | 4494.82    | 2138.51             | 96.85      |
| 126         | 2391.79             | 4764.33    | 2164.58             | 98.74      |
| 133         | 2407.29             | 4754.82    | 2236.26             | 100.79     |
| 140         | 2116.90             | 4077.46    | 1993.23             | 86.28      |
| 147         | 2235.28             | 4319.53    | 1988.38             | 89.45      |
| 154         | 2190.88             | 4269.16    | 2037.10             | 91.60      |
| 161         | 2277.52             | 4407.87    | 2032.61             | 91.94      |
| 168         | 2313.08             | 4526.04    | 2082.51             | 92.90      |
| 175         | 2324.08             | 4654.94    | 2089.68             | 94.78      |
| 182         | 2331.86             | 4442.21    | 2102.42             | 93.59      |
| 189         | 2131.34             | 3987.74    | 1957.39             | 85.58      |
| 196         | 2237.32             | 4139.86    | 2012.40             | 89.21      |

| Time in min | Parameter setting A |            | Parameter setting D |            |
|-------------|---------------------|------------|---------------------|------------|
|             | Li 812.6 nm         | H 486.1 nm | Li 670.7 nm         | H 486.1 nm |
| 203         | 2264.43             | 4257.55    | 2069.83             | 91.25      |
| 210         | 2206.44             | 4399.86    | 2102.09             | 95.19      |
| 217         | 2263.82             | 4483.94    | 2045.68             | 93.63      |
| 224         | 2269.45             | 4530.06    | 2159.44             | 96.87      |
| 231         | 2340.71             | 4540.59    | 2123.39             | 95.85      |
| 238         | 2255.28             | 4028.74    | 1934.85             | 85.61      |
| 245         | 2295.90             | 4204.27    | 2012.78             | 88.17      |
| 252         | 2210.94             | 4290.85    | 2036.76             | 88.82      |
| 259         | 2228.03             | 4354.41    | 2012.54             | 91.90      |
| 266         | 2349.95             | 4580.78    | 2131.90             | 95.24      |
| 273         | 2308.18             | 4532.91    | 2094.15             | 94.23      |
| 280         | 2314.05             | 4601.68    | 2127.62             | 97.26      |
| 287         | 2373.25             | 4789.35    | 2165.95             | 97.96      |
| 294         | 2209.70             | 4119.88    | 2255.42             | 98.59      |
| 301         | 2253.31             | 4226.07    | 2040.15             | 90.92      |
| 308         | 2261.84             | 4360.47    | 2023.40             | 91.73      |
| 315         | 2209.44             | 4351.02    | 2140.32             | 95.29      |
| 322         | 2357.85             | 4619.06    | 2173.33             | 97.71      |
| 329         | 2377.35             | 4652.74    | 2117.02             | 96.67      |
| 336         | 2396.27             | 4731.72    | 2240.48             | 100.10     |
| 343         | 2269.69             | 4069.46    | 2223.31             | 99.42      |
| 350         | 2319.96             | 4175.02    | 2066.47             | 90.43      |
| 357         | 2371.53             | 4443.02    | 2136.28             | 95.16      |
| 364         | 2363.29             | 4528.47    | 2191.71             | 96.43      |
| 371         | 2521.96             | 4647.91    | 2190.19             | 98.12      |
| 378         | 2394.16             | 4674.37    | 2232.67             | 97.45      |
| 385         | 2541.28             | 4840.79    | 2192.72             | 98.45      |
| 392         | 2341.46             | 4189.87    | 1956.54             | 87.37      |
| 399         | 2147.10             | 4203.13    | 2045.95             | 91.79      |
| 406         | 2349.40             | 4435.87    | 2105.16             | 94.92      |
| 413         | 2415.84             | 4634.58    | 2162.98             | 96.77      |
| 420         | 2416.87             | 4697.81    | 2161.48             | 97.36      |
| 427         | 2453.61             | 4693.65    | 2209.82             | 98.05      |
| 434         | 2389.84             | 4809.08    | 2219.82             | 99.36      |
| 441         | 2275.87             | 4209.04    | 1996.62             | 89.34      |
| 448         | 2354.93             | 4364.66    | 2082.73             | 90.97      |
| 455         | 2452.85             | 4565.03    | 2120.30             | 95.62      |
| 462         | 2410.95             | 4673.62    | 2247.44             | 98.33      |
| 469         | 2492.29             | 4746.03    | 2232.92             | 97.80      |
| 476         | 2520.14             | 4670.71    | 2270.65             | 99.95      |
| 483         | 2558.85             | 4979.96    | 2273.38             | 99.73      |
| 490         | 2365.30             | 4294.15    | 2064.95             | 91.12      |
| 497         | 2297.81             | 4254.18    | 2055.40             | 90.36      |
| 504         | 2374.44             | 4567.80    | 2145.15             | 95.67      |
| 511         | 2439.86             | 4798.20    | 2262.93             | 97.45      |
| 518         | 2466.35             | 4667.78    | 2240.39             | 96.77      |
| 525         | 2473.50             | 4782.99    | 2196.31             | 100.13     |
| 532         | 2586.36             | 4900.75    | 2333.68             | 99.98      |
| 539         | 2399.10             | 4346.84    | 2248.23             | 100.17     |
| 546         | 2398.71             | 4520.29    | 2185.81             | 95.27      |

| Time in min | Parameter setting A |            | Parameter setting D |            |
|-------------|---------------------|------------|---------------------|------------|
|             | Li 812.6 nm         | H 486.1 nm | Li 670.7 nm         | H 486.1 nm |
| 553         | 2483.20             | 4642.03    | 2192.44             | 95.21      |
